# Supplementary material for: Flexible TiO2/cellulose acetate hybrid film as a recyclable photocatalyst
Source: Royal Society of Chemistry journal article supplement (doi:10.1039/c3ra47710j), 2014-01-01
Supplement: c3ra47710j.pdf [file c3ra47710j.pdf]

# Flexible TiO<sub>2</sub>/Cellulose Acetate Hybrid Film as Recyclable Photocatalyst

Xiujuan Jin<sup>a</sup>, Jing Xu<sup>a</sup>, Xianfu Wang<sup>a</sup>, Zhong Xie<sup>a</sup>, Zhe Liu<sup>a,b</sup>, Bo Liang<sup>a,b</sup>, Di Chen<sup>\*a</sup> and Guozhen Shen<sup>\*b</sup>

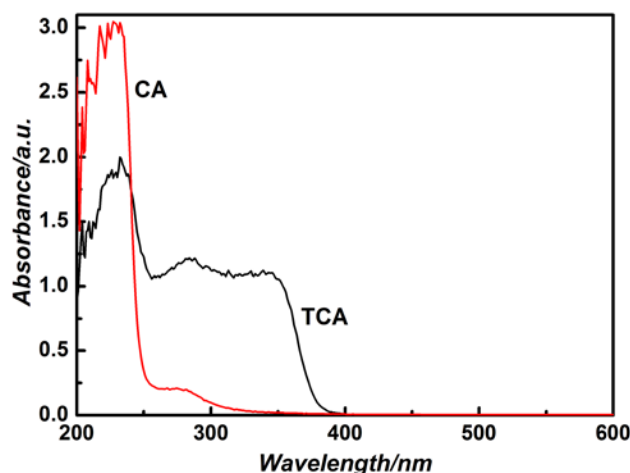

Figure S1. UV-vis absorption spectra of CA film and TCA hybrid film.

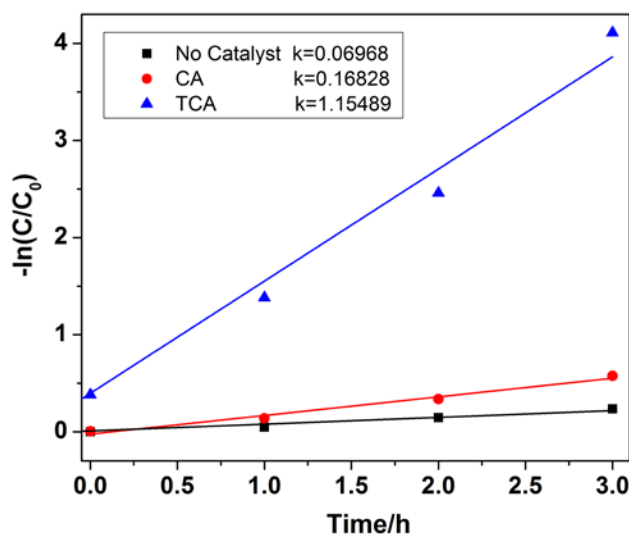

Figure S2. Kinetic linear simulation curves of MB photocatalytic degradation. The vertical line at  $t=0$  separates the dark period from the UV-irradiated one.

It is well known that the photocatalytic degradation of MB followed the Langmuir-Hinshelwood kinetics. The values of the apparent first-order reaction rate constant  $k$  can be determined from below equation:

$$\ln(C_0/C)=kt$$

Therein,  $k$  is the degradation reaction rate constant,  $C_0$  and  $C$  are the initial concentration and the concentration at reaction time  $t$  for MB, respectively.

## References:

- 1 M.R. Hoffmann, S.T. Martin, W. Choi, D.W. Bahnemann, *Chem. Rev.*, 1995, **95**, 69.
- 2 C. Y. Su, Y. F. Tong, M. Y. Zhang, Y. Zhang, C. L. Shao, *RSC Advance*, 2013, **3**, 7503.

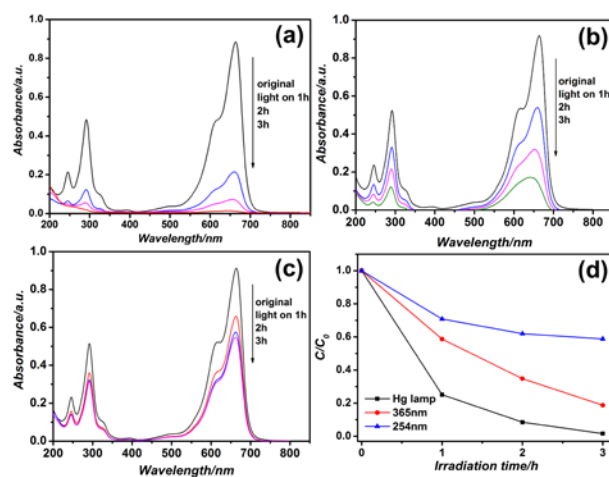

**Figure S3.** UV-vis adsorption spectra of MB solution under different light sources in the presence of TCA hybrid film. (a) Hg lamp, (b) UV-365 nm LED and (c) UV-254 nm LED. (d) MB concentration changes under different light sources.

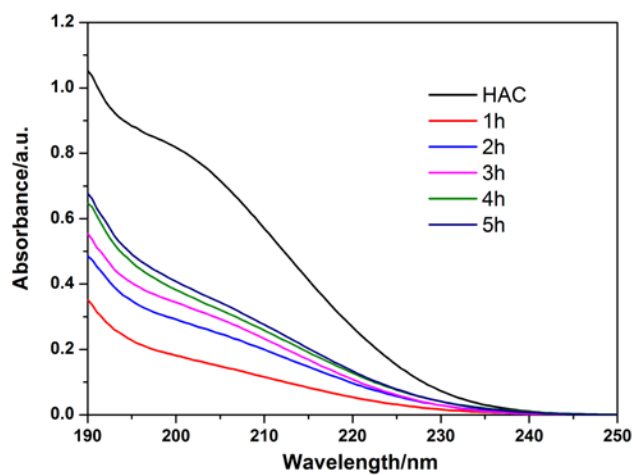

**Figure S4.** UV-vis absorption spectra of aqueous solution with CA film under the irradiation of UV light.
